# Supplementary material for: Effects of Ganjianglingzhu Decoction on Lean Non-Alcoholic Fatty Liver Disease in Mice Based on Untargeted Metabolomics
Source: MDPI journal article supplement (doi:10.3390/ph17040502), 2024-04-15
Supplement: s1 [file s1]

**Table S1.** Elution gradient

| Time (min) | A%    | B%     |
|------------|-------|--------|
| 0~3        | 0     | 100    |
| 3~7        | 0~7   | 100~93 |
| 7~10       | 7~10  | 93~90  |
| 10~28      | 10~40 | 90~60  |
| 28~38      | 40~95 | 60~5   |
| 38~42      | 95    | 5      |
| 42~42.1    | 95~0  | 5~100  |
| 42.1~45    | 0     | 100    |

**Table S1.** Mass parameters (Sciex Triple TOF 4600 LC-MS)

| MS parameters                  | Values     | MS/MS parameters             | Values  |
|--------------------------------|------------|------------------------------|---------|
| TOF mass range                 | 50~1700    | MS/MS mass range             | 50~1250 |
| Ion Source Gas 1 (psi)         | 50         | Declustering Potential (V)   | 100     |
| Ion Source Gas 2 (psi)         | 50         | Collision Energy (eV)        | ±40     |
| Curtain Gas (psi)              | 35         | Collision Energy Spread (eV) | 20      |
| Ion Spray Voltage Floating (V) | -4500/5000 | Ion Release Delay (ms)       | 30      |
| Ion Source Temperature (°C)    | 500        | Ion Release Width (ms)       | 15      |
| Declustering Potential (V)     | 100        |                              |         |
| Collision Energy (eV)          | 10         |                              |         |

**Figure S1.** Food intake of mice

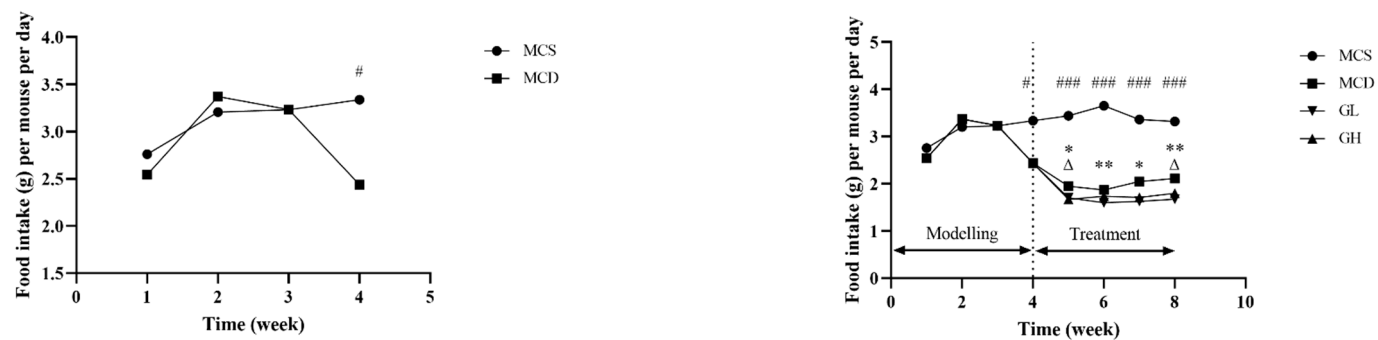

GH: high dose of GJLZ; GJLZ: Ganjianglingzhu; GL: low dose of GJLZ; MCD: methio-nine-choline-deficient; MCS: methionine-choline-sufficient.

<sup>#</sup> $p < 0.050$ , and <sup>###</sup> $p < 0.001$ : MCD group compared with the MCS group; <sup>\*</sup> $p < 0.050$ , and <sup>\*\*</sup> $p < 0.010$ : GL group compared with the MCD group; <sup>Δ</sup> $p < 0.050$ : GH group compared with the MCD group.

**Table S3.** Main component identification of GJLZ decoction

| No. | RT (min) | Adduct ions        | Measured m/z | Respected m/z | ppm  | Formula                                                       | M.W.   | Identification                                                        | MS/MS data                                                | Source                                                     | CAS Number       | Peak Area | Component Percentage | Data-base | References |
|-----|----------|--------------------|--------------|---------------|------|---------------------------------------------------------------|--------|-----------------------------------------------------------------------|-----------------------------------------------------------|------------------------------------------------------------|------------------|-----------|----------------------|-----------|------------|
| 1   | 1.36     | [M-H] <sup>-</sup> | 195.0506     | 195.0510      | -2.2 | C <sub>6</sub> H <sub>12</sub> O <sub>7</sub>                 | 196.06 | Gluconic acid                                                         | 195.0493;129.0189;75.0085;5<br>9.0132                     | Glycyrrhizae<br>Radix et Rhizoma;<br>Zingiberis<br>Rhizoma | 526-95-4         | 4093177   | 4.02%                |           |            |
| 2   | 3.41     | [M-H] <sup>-</sup> | 191.0195     | 191.0197      | -1.2 | C <sub>6</sub> H <sub>8</sub> O <sub>7</sub>                  | 192.03 | Citric acid                                                           | 191.0190;111.0072;87.0073;6<br>7.0171;57.0330             | All                                                        | 77-92-9          | 2829467   | 2.78%                | √         |            |
| 3   | 3.62     | [M+H] <sup>+</sup> | 144.1019     | 144.1019      | 0.0  | C <sub>7</sub> H <sub>13</sub> NO <sub>2</sub>                | 143.09 | Stachydrine                                                           | 144.1021;84.0812;56.0475                                  | Glycyrrhizae<br>Radix et Rhizoma;<br>Zingiberis<br>Rhizoma | 471-87-4         | 3098821   | 3.05%                | √         |            |
| 4   | 8.01     | [M+H] <sup>+</sup> | 268.1036     | 268.1040      | -1.6 | C <sub>10</sub> H <sub>13</sub> N <sub>5</sub> O <sub>4</sub> | 267.10 | Adenosine                                                             | 268.1051;136.0618;119.0345                                | All                                                        | 58-61-7          | 997348    | 0.98%                | √         |            |
| 5   | 13.50    | [M+H] <sup>+</sup> | 250.1437     | 250.1438      | -0.3 | C <sub>14</sub> H <sub>19</sub> NO <sub>3</sub>               | 249.14 | (2R,4R)-2-carboxy-1,1-dimethyl-4-(phenylmethoxy)-pyrrolidinium        | 250.1432;84.0784;56.0466                                  | /                                                          | 1070772<br>-59-6 | 2163810   | 2.13%                |           |            |
| 6   | 13.81    | [M+H] <sup>+</sup> | 250.1447     | 250.1438      | 3.7  | C <sub>14</sub> H <sub>19</sub> NO <sub>3</sub>               | 249.14 | (2R,4R)-2-carboxy-1,1-dimethyl-4-(phenylmethoxy)-pyrrolidinium isomer | 250.1432;84.0784;56.0467                                  | /                                                          | /                | 1499658   | 1.47%                |           |            |
| 7   | 13.87    | [M-H] <sup>-</sup> | 209.0446     | 209.0455      | -4.5 | C <sub>10</sub> H <sub>10</sub> O <sub>5</sub>                | 210.05 | (p-Hydroxybenzyl)malonic acid                                         | 165.0533;121.0629;93.0323;5<br>9.0113                     | Glycyrrhizae<br>Radix et Rhizoma                           | 90844-1<br>6-9   | 1615664   | 1.59%                |           | 1          |
| 8   | 17.98    | [M+H] <sup>+</sup> | 565.1563     | 565.1552      | 2.0  | C <sub>26</sub> H <sub>28</sub> O <sub>14</sub>               | 564.15 | Schaftoside                                                           | 565.1589;547.1470;529.1365;<br>427.1045;379.0840;325.0719 | Glycyrrhizae<br>Radix et Rhizoma                           | 51938-3<br>2-0   | 2168819   | 2.13%                | √         |            |
| 9   | 19.26    | [M+H] <sup>+</sup> | 579.1733     | 579.1708      | 4.3  | C <sub>27</sub> H <sub>30</sub> O <sub>14</sub>               | 578.16 | Violanthin                                                            | 579.1785;561.1672;543.1556;                               | Glycyrrhizae                                               | 40581-1          | 1975749   | 1.94%                | √         |            |

|    |       |                    |          |          |      |                                                               |        |                                  |                                                  |                                  |                  |              |        |   |   |
|----|-------|--------------------|----------|----------|------|---------------------------------------------------------------|--------|----------------------------------|--------------------------------------------------|----------------------------------|------------------|--------------|--------|---|---|
|    |       |                    |          |          |      |                                                               |        |                                  | 5251420;457.1148;379.0803;3<br>25.0682           | Radix et Rhizoma                 | 7-7              |              |        |   |   |
| 10 | 19.59 | [M-H] <sup>-</sup> | 549.1649 | 549.1614 | 6.4  | C <sub>26</sub> H <sub>30</sub> O <sub>13</sub>               | 550.17 | Liquiritin apioside              | 549.1618;255.0662;135.0091;<br>119.0502          | Glycyrrhizae<br>Radix et Rhizoma | 74639-1<br>4-8   | 1097108<br>3 | 10.78% | √ |   |
| 11 | 19.78 | [M-H] <sup>-</sup> | 417.1196 | 417.1191 | 1.2  | C <sub>21</sub> H <sub>22</sub> O <sub>9</sub>                | 418.13 | Liquiritin                       | 255.0654;148.0193;135.0086;<br>119.0497;         | Glycyrrhizae<br>Radix et Rhizoma | 551-15-5         | 1140583<br>1 | 11.21% | √ |   |
| 12 | 21.97 | [M+H] <sup>+</sup> | 679.5146 | 679.5117 | 4.3  | C <sub>36</sub> H <sub>66</sub> N <sub>6</sub> O <sub>6</sub> | 678.50 | Cyclic hexaleucine               | 679.5183;661.5052;336.2317;<br>209.1657          | All                              | 83793-1<br>2-8   | 1667077      | 1.64%  |   |   |
| 13 | 22.15 | [M-H] <sup>-</sup> | 187.0974 | 187.0976 | -1.0 | C <sub>9</sub> H <sub>16</sub> O <sub>4</sub>                 | 188.10 | Azelaic acid                     | 187.0980;169.0867;125.0970;<br>97.0664           | Zingiberis<br>Rhizoma            | 123-99-9         | 1163169      | 1.14%  |   | 2 |
| 14 | 23.01 | [M-H] <sup>-</sup> | 549.1657 | 549.1614 | 7.9  | C <sub>26</sub> H <sub>30</sub> O <sub>13</sub>               | 550.17 | Isoliquiritin apioside           | 549.1695;255.0679;135.0072;<br>119.0489          | Glycyrrhizae<br>Radix et Rhizoma | 120926-<br>46-7  | 1603404      | 1.58%  | √ |   |
| 15 | 23.53 | [M+H] <sup>+</sup> | 431.1342 | 431.1337 | 1.3  | C <sub>22</sub> H <sub>22</sub> O <sub>9</sub>                | 430.13 | Ononin                           | 269.0806;254.0584;237.0545;<br>213.0871          | Glycyrrhizae<br>Radix et Rhizoma | 486-62-4         | 3301338      | 3.24%  | √ |   |
| 16 | 23.65 | [M-H] <sup>-</sup> | 417.1211 | 417.1191 | 4.8  | C <sub>21</sub> H <sub>22</sub> O <sub>9</sub>                | 418.13 | Isoliquiritin                    | 255.0670;148.0164;135.0071;<br>119.0487          | Glycyrrhizae<br>Radix et Rhizoma | 5041-81-<br>6    | 1748860      | 1.72%  | √ |   |
| 17 | 25.22 | [M-H] <sup>-</sup> | 255.0670 | 255.0663 | 2.8  | C <sub>15</sub> H <sub>12</sub> O <sub>4</sub>                | 256.07 | Liquiritigenin                   | 255.0649;135.0069;119.0487;<br>91.0176           | Glycyrrhizae<br>Radix et Rhizoma | 578-86-9         | 2691896      | 2.65%  | √ |   |
| 18 | 26.91 | [M-H] <sup>-</sup> | 853.3985 | 853.4016 | -3.6 | C <sub>42</sub> H <sub>62</sub> O <sub>18</sub>               | 854.39 | 22-Hydroxy-Licoricesaponin<br>G2 | 853.3838;351.0562                                | Glycyrrhizae<br>Radix et Rhizoma | 1262326<br>-48-6 | 623828       | 0.61%  |   | 3 |
| 19 | 27.21 | [M+H] <sup>+</sup> | 985.4686 | 985.4639 | 4.8  | C <sub>48</sub> H <sub>72</sub> O <sub>21</sub>               | 984.46 | Licoricesaponin A3               | 985.4847;809.4508;647.3904;<br>615.3991;453.3425 | Glycyrrhizae<br>Radix et Rhizoma | 118325-<br>22-7  | 2939612      | 2.89%  |   | 4 |
| 20 | 28.24 | [M+H] <sup>+</sup> | 881.4210 | 881.4165 | 5.1  | C <sub>44</sub> H <sub>64</sub> O <sub>18</sub>               | 880.41 | 22β-Acetoxyl-glycyrrhizin        | 881.4352;705.3977;529.3568;<br>511.3481;451.3227 | Glycyrrhizae<br>Radix et Rhizoma | 938042-<br>17-2  | 1174216      | 1.15%  |   | 4 |
| 21 | 28.53 | [M+H] <sup>+</sup> | 839.4083 | 839.4060 | 2.8  | C <sub>42</sub> H <sub>62</sub> O <sub>17</sub>               | 838.40 | Macedonoside A                   | 839.4206;663.3845;487.3462;<br>469.3363;451.3252 | Glycyrrhizae<br>Radix et Rhizoma | 256441-<br>31-3  | 1769702      | 1.74%  |   | 3 |

|    |       |                                        |          |          |      |                                                 |        |                                      |                                                           |                                  |                  |         |       |   |   |
|----|-------|----------------------------------------|----------|----------|------|-------------------------------------------------|--------|--------------------------------------|-----------------------------------------------------------|----------------------------------|------------------|---------|-------|---|---|
| 22 | 30.11 | [M+H] <sup>+</sup>                     | 839.4134 | 839.4060 | 8.8  | C <sub>42</sub> H <sub>62</sub> O <sub>17</sub> | 838.40 | Licorice saponin G2                  | 839.4220;663.3851;645.3725;<br>487.3455;469.3343;451.3233 | Glycyrrhizae<br>Radix et Rhizoma | 118441-<br>84-2  | 7669503 | 7.54% |   | 4 |
| 23 | 30.75 | [M+H] <sup>+</sup>                     | 839.4088 | 839.4060 | 3.4  | C <sub>42</sub> H <sub>62</sub> O <sub>17</sub> | 838.40 | Uralsaponin U                        | 839.4216;663.3847;645.3731;<br>487.3464;469.3352;451.3247 | Glycyrrhizae<br>Radix et Rhizoma | 1616062<br>-86-2 | 2222775 | 2.18% |   |   |
| 24 | 31.14 | [M+H] <sup>+</sup>                     | 839.4130 | 839.4060 | 8.4  | C <sub>42</sub> H <sub>62</sub> O <sub>17</sub> | 838.40 | Uralsaponin N                        | 839.4190;645.3741;487.3488;<br>469.3368;451.3268          | Glycyrrhizae<br>Radix et Rhizoma | 1616062<br>-79-3 | 2901117 | 2.85% |   | 4 |
| 25 | 31.26 | [M-H] <sup>-</sup>                     | 821.4089 | 821.4118 | -3.5 | C <sub>42</sub> H <sub>62</sub> O <sub>16</sub> | 822.40 | Glycyrrhizin                         | 821.3986;351.0573;193.0362                                | Glycyrrhizae<br>Radix et Rhizoma | 1405-86-<br>3    | 6638982 | 6.53% | √ |   |
| 26 | 32.02 | [M-H] <sup>-</sup>                     | 821.4071 | 821.4118 | -5.7 | C <sub>42</sub> H <sub>62</sub> O <sub>16</sub> | 822.40 | Uralsaponin B                        | 821.3990;351.0528;193.0319                                | Glycyrrhizae<br>Radix et Rhizoma | 105038-<br>43-5  | 3194677 | 3.14% |   | 5 |
| 27 | 32.26 | [M+H] <sup>+</sup>                     | 823.4155 | 823.4111 | 5.4  | C <sub>42</sub> H <sub>62</sub> O <sub>16</sub> | 822.40 | Licoricesaponin H2                   | 823.4234;647.3826;611.3652;<br>471.3510;453.3404;435.3289 | Glycyrrhizae<br>Radix et Rhizoma | 118441-<br>85-3  | 2040113 | 2.01% |   |   |
| 28 | 32.48 | [M+H] <sup>+</sup>                     | 825.4300 | 825.4267 | 4.0  | C <sub>42</sub> H <sub>64</sub> O <sub>16</sub> | 824.42 | Licoricesaponin J2                   | 825.4444;649.4079;613.3861;<br>455.3592;437.3481          | Glycyrrhizae<br>Radix et Rhizoma | 938042-<br>18-3  | 3076784 | 3.02% |   |   |
| 29 | 32.80 | [M-H <sub>2</sub><br>O+H] <sup>+</sup> | 277.1805 | 277.1803 | 0.6  | C <sub>17</sub> H <sub>26</sub> O <sub>4</sub>  | 294.18 | 6-Gingerol                           | 177.0896;162.0685;145.0633;<br>137.0599;117.0689          | Zingiberis<br>Rhizoma            | 23513-1<br>4-6   | 1352791 | 1.33% | √ |   |
| 30 | 33.06 | [M-H] <sup>-</sup>                     | 807.4237 | 807.4172 | 8.0  | C <sub>42</sub> H <sub>64</sub> O <sub>15</sub> | 808.42 | Licoricesaponin B2                   | 807.4200;351.0538;193.0328                                | Glycyrrhizae<br>Radix et Rhizoma | 118536-<br>86-0  | 786084  | 0.77% |   |   |
| 31 | 33.73 | [M+H] <sup>+</sup>                     | 249.1491 | 249.1485 | 2.3  | C <sub>15</sub> H <sub>20</sub> O <sub>3</sub>  | 248.14 | Atractylenolide III                  | 231.1402;213.1285;189.0910;<br>163.0749;105.0683;91.0521  | Macrocephalae<br>Rhizoma         | 73030-7<br>1-4   | 101440  | 0.10% | √ |   |
| 32 | 34.13 | [M+H] <sup>+</sup>                     | 647.3835 | 647.3790 | 7.0  | C <sub>36</sub> H <sub>54</sub> O <sub>10</sub> | 646.37 | Glycyrrhetic acid<br>3-O-glucuronide | 647.3877;471.3535;453.3415;<br>435.3311                   | Glycyrrhizae<br>Radix et Rhizoma | 34096-8<br>3-8   | 3438001 | 3.38% |   |   |
| 33 | 35.93 | [M+H] <sup>+</sup>                     | 233.1541 | 233.1536 | 2.1  | C <sub>15</sub> H <sub>20</sub> O <sub>2</sub>  | 232.15 | Atractylenolide II                   | 233.1551;215.1434;187.1479;<br>131.0853                   | Macrocephalae<br>Rhizoma         | 73030-7<br>1-4   | 211276  | 0.21% | √ |   |
| 34 | 36.37 | [M-H <sub>2</sub><br>O+H] <sup>+</sup> | 467.3168 | 467.3161 | 1.5  | C <sub>30</sub> H <sub>44</sub> O <sub>5</sub>  | 484.32 | Poricoic acid B                      | 467.3207;449.3101;325.2193;<br>307.2082;223.1480          | Poria                            | 137551-<br>39-4  | 2969583 | 2.92% | √ |   |

|    |       |                    |          |          |     |                                                |        |                   |                                         |                                  |             |         |       |   |
|----|-------|--------------------|----------|----------|-----|------------------------------------------------|--------|-------------------|-----------------------------------------|----------------------------------|-------------|---------|-------|---|
| 35 | 37.05 | [M-H] <sup>-</sup> | 497.3312 | 497.3272 | 7.9 | C <sub>31</sub> H <sub>46</sub> O <sub>5</sub> | 498.33 | Poricoic acid A   | 497.3270;423.2910                       | Poria                            | 137551-38-3 | 1126775 | 1.11% | √ |
| 36 | 37.23 | [M-H] <sup>-</sup> | 485.3313 | 485.3272 | 8.3 | C <sub>30</sub> H <sub>46</sub> O <sub>5</sub> | 486.33 | Poricoic acid G   | 485.3302;441.3380;423.3327;<br>397.2722 | Poria                            | 415724-84-4 | 794109  | 0.78% |   |
| 37 | 38.25 | [M+H] <sup>+</sup> | 471.3491 | 471.3469 | 4.7 | C <sub>30</sub> H <sub>46</sub> O <sub>4</sub> | 470.34 | Glycyrrhetic acid | 471.3488;317.2089;235.1668;<br>189.1619 | Glycyrrhizae<br>Radix et Rhizoma | 526-95-4    | 1715150 | 1.69% | √ |

The source of the components was determined by the Natural Products HR-MS/MS Spectral Library 1.0 database and the literature.

GJLZ: Ganjianglingzhu.

**Table S4.** List of the identified metabolites of the intersection statistics between MCS vs. MCD and MCD vs. GL in positive and negative ion mode based on UHPLC-Q-TOF/MS

| m/z         | Retention time (min) | Ion mode | Formula     | Metabolites                                                       | VIP         | P-value     | FC          |             |
|-------------|----------------------|----------|-------------|-------------------------------------------------------------------|-------------|-------------|-------------|-------------|
|             |                      |          |             |                                                                   |             |             | MCS vs. MCD | MCD vs. GL  |
| 453.2860415 | 7.848233333          | neg      | C24H40O5    | alpha-Muricholic acid                                             | 16.06769146 | 0.001366585 | 0.226549791 | 4.844474413 |
| 854.5920444 | 11.47483333          | neg      | C46H84NO8P  | PE(22:4(7Z,10Z,13Z,16Z)/19:0)                                     | 11.85212432 | 0.000161857 | 1.861265702 | 0.653574112 |
| 373.2735342 | 8.718383333          | pos      | C24H36O3    | 3alpha-Hydroxy-5beta-chola-7,9(11)-dien-24-oic Acid               | 10.53291874 | 0.001324031 | 0.254796555 | 4.932638804 |
| 469.2808627 | 6.996783333          | neg      | C24H40O6    | 3alpha,6alpha,7beta,12alpha-Tetrahydroxy-5beta-cholan-24-oic Acid | 9.722835203 | 0.00032875  | 0.108749729 | 5.89703359  |
| 786.6001094 | 12.6016              | pos      | C44H86NO9P  | PS(O-20:0/18:1(9Z))                                               | 9.283616715 | 0.016021262 | 1.313988022 | 0.796299615 |
| 526.2928203 | 10.2723              | pos      | C27H44NO7P  | LysoPE(0:0/22:6(4Z,7Z,10Z,13Z,16Z,19Z))                           | 9.248142084 | 0.002656101 | 0.589762419 | 1.94542687  |
| 475.2678339 | 7.848233333          | neg      | C26H38O5    | 15-keto Latanoprost                                               | 7.181839741 | 0.001131022 | 0.312034456 | 3.641811108 |
| 837.5497715 | 7.848233333          | neg      | C43H83O13P  | PI(18:0/16:0)                                                     | 5.834670211 | 0.002426321 | 0.074756485 | 17.15141474 |
| 113.0713445 | 14.8042              | pos      | C5H5NO      | 2-Hydroxypyridine                                                 | 5.509739735 | 7.52517E-06 | 1.075065689 | 0.845072861 |
| 165.113551  | 14.23996667          | pos      | C8H14N4O    | Carcinine                                                         | 5.38750534  | 0.000454935 | 1.071885203 | 0.879479787 |
| 778.5606782 | 11.15276667          | neg      | C40H80NO8P  | PE(17:0/18:0)                                                     | 5.172443046 | 2.76339E-05 | 1.490406477 | 0.463082293 |
| 817.5815506 | 7.860566667          | pos      | C47H83N2O8P | SM(d20:1/22:6(4Z,7Z,11E,13Z,15E,19Z)-2OH(10S,17))                 | 4.934201668 | 0.004592119 | 0.063764653 | 20.246504   |
| 140.0818873 | 14.62146667          | pos      | C6H9N3O     | 4-Amino-5-hydroxymethyl-2-methylpyrimidine                        | 4.893726991 | 6.10507E-05 | 1.085666755 | 0.865260905 |
| 528.3084425 | 10.55285             | pos      | C27H46NO7P  | LysoPE(0:0/22:5(7Z,10Z,13Z,16Z,19Z))                              | 4.815800027 | 0.001703836 | 0.636027276 | 2.437083044 |
| 136.0870209 | 14.23996667          | pos      | C7H11N3O    | N-Acetylhistamine                                                 | 4.534554115 | 0.0001237   | 1.078505749 | 0.873425882 |
| 385.2921892 | 11.77858333          | pos      | C20H42O5    | Tetraethylene glycol monododecyl ether                            | 4.336763663 | 5.92961E-06 | 1.14370385  | 0.789299844 |
| 167.1291583 | 13.75586667          | pos      | C8H11N3     | N4-Cyclopropylpyridine-3,4-diamine                                | 4.255261238 | 0.000544813 | 1.092627165 | 0.890206265 |
| 391.2838236 | 8.718383333          | pos      | C24H40O5    | Cholic acid                                                       | 4.141842644 | 0.001435452 | 0.346500761 | 2.984338756 |
| 140.1182257 | 13.57166667          | pos      | C7H10N2     | 2-Ethyl-3-methylpyrazine, 9CI                                     | 3.673824424 | 0.000215157 | 1.089113659 | 0.876178846 |
| 583.3128792 | 6.284083333          | neg      | C30H48O11   | Cholic acid glucuronide                                           | 3.44490509  | 0.001491345 | 0.010451425 | 8.592156431 |

|             |             |     |              |                                                                                                            |             |             |             |             |
|-------------|-------------|-----|--------------|------------------------------------------------------------------------------------------------------------|-------------|-------------|-------------|-------------|
| 384.1151189 | 2.858283333 | pos | C14H17N5O8   | N6-Succinyl Adenosine                                                                                      | 3.058379975 | 0.000341774 | 0.407844814 | 1.440757454 |
| 322.1068463 | 1.148183333 | pos | C11H19N3O6S  | Glycine, L-g-glutamyl-L-cysteinyl-, 3-methyl ester                                                         | 3.014644757 | 2.8149E-05  | 2.721605591 | 0.549565878 |
| 531.2730091 | 13.22983333 | neg | C25H43O7P    | LysoPA(22:4(7Z,10Z,13Z,16Z)/0:0)                                                                           | 3.010902638 | 1.91644E-05 | 0.237951743 | 1.660520967 |
| 206.1401319 | 14.23996667 | pos | C10H15N5     | trapidil                                                                                                   | 2.926539149 | 0.000905415 | 1.114911152 | 0.91130873  |
| 219.1353051 | 14.00665    | pos | C12H20O2     | 5-Dodecen-11-olide                                                                                         | 2.855754692 | 5.05922E-05 | 1.063908597 | 0.852442627 |
| 627.2379316 | 6.996783333 | neg | C40H38O8     | Kuwanon V                                                                                                  | 2.739527784 | 0.000187906 | 0.113980576 | 5.895979673 |
| 250.0934556 | 2.0601      | pos | C10H13N5O4   | 3'-Azido-3'-deoxythymidine, 98%                                                                            | 2.556042044 | 0.01805219  | 1.996704237 | 0.60146999  |
| 438.3790106 | 14.88846667 | pos | C26H49D3O2   | Cerotic acid(d3)                                                                                           | 2.317113149 | 0.000779744 | 1.130871615 | 0.884973633 |
| 355.262961  | 6.936316667 | pos | C24H36O3     | (22E)-3beta-Hydroxy-5alpha-chola-7,22-dien-24-oic Acid                                                     | 2.316396969 | 0.004799261 | 0.353599115 | 7.972818097 |
| 152.0819165 | 15.45048333 | pos | C7H11N3O2    | 4-[(2R)-2-Aminopropyl]imidazole-1-carboxylic acid                                                          | 2.315236581 | 3.19438E-05 | 1.071715431 | 0.857700825 |
| 469.3136183 | 12.68865    | pos | C24H46O7     | bhas#32                                                                                                    | 2.15548826  | 0.00030328  | 1.099248695 | 0.878286546 |
| 679.2300008 | 7.848233333 | neg | C25H44O21    | 6"-O-alpha-D-Galactopyranosylciceritol                                                                     | 2.105023846 | 0.003114694 | 0.438025094 | 2.567048178 |
| 510.2532577 | 5.433816667 | neg | C26H43NO8S   | Glycochenodeoxycholate-3-sulfate                                                                           | 2.083568622 | 0.028446879 | 3.425319018 | 0.076758719 |
| 640.29266   | 11.58128333 | neg | C30H47N3O10S | Lipoxin C4                                                                                                 | 2.051988399 | 0.012013848 | 0.627328289 | 1.369590968 |
| 1041.512013 | 7.848233333 | neg | C52H86O18P2  | PIP(22:3(10Z,13Z,16Z)/PGJ2)                                                                                | 2.017022227 | 0.00055419  | 0.124993695 | 11.39962287 |
| 303.2316966 | 11.92163333 | pos | C20H30O2     | 8,13-Abietadien-18-oic acid                                                                                | 1.972066461 | 0.000450838 | 0.21527453  | 1.949930443 |
| 492.2580989 | 7.848233333 | neg | C25H34F3N5O2 | 4-[[2-Methyl-2-[4-[5-(trifluoromethyl)pyridin-2-yl]piperazin-1-yl]propanoyl]amino]adamantane-1-carboxamide | 1.875310612 | 0.000990815 | 0.22547304  | 4.310799004 |
| 469.2808552 | 6.097783333 | neg | C24H40O6     | 1,3,7,12-Tetrahydroxycholan-24-oic acid                                                                    | 1.868118712 | 0.002301881 | 0.147336927 | 3.243054045 |
| 869.5404484 | 6.996783333 | neg | C45H79NO10P+ | PC(DiMe(9,3)/MonoMe(9,5))                                                                                  | 1.826523141 | 0.002387582 | 0.03411912  | 41.30518855 |
| 205.1197046 | 14.23996667 | pos | C9H12N6      | Triethylenemelamine                                                                                        | 1.775420506 | 2.27093E-05 | 1.062822884 | 0.843406864 |
| 443.2570897 | 8.724516667 | neg | C23H41O6P    | sn-3-O-(geranylgeranyl)glycerol 1-phosphate                                                                | 1.734620937 | 0.000615875 | 0.169564818 | 6.888963795 |
| 763.213171  | 6.996783333 | neg | C19H18N4O3S  | Ilaprazole sulfone                                                                                         | 1.682270911 | 9.99513E-05 | 0.107766847 | 6.579491374 |
| 1045.537204 | 8.724516667 | neg | C34H37NO4    | Deoxynojirimycin Tetrabenzyl Ether                                                                         | 1.661775502 | 0.000587262 | 0.245658693 | 7.25788903  |
| 450.0882438 | 2.856116667 | neg | C17H25NO9S2  | 4-Phenylbutyl glucosinolate                                                                                | 1.628887677 | 0.000676201 | 0.421192865 | 1.607825373 |



|             |             |     |              |                                                                                                                                |             |             |             |             |
|-------------|-------------|-----|--------------|--------------------------------------------------------------------------------------------------------------------------------|-------------|-------------|-------------|-------------|
| 136.0619124 | 0.729716667 | pos | C5H7N5O      | FAPy-adenine                                                                                                                   | 1.588370802 | 0.003613695 | 2.044405623 | 0.675213054 |
| 837.5503184 | 7.605466667 | neg | C46H81NO10P+ | PC(MonoMe(9,5)/MonoMe(9,5))                                                                                                    | 1.584641504 | 0.008909771 | 0.044907589 | 6.119643283 |
| 552.3673712 | 11.15276667 | neg | C26H54NO6P   | LysoPC(P-18:0/0:0)                                                                                                             | 1.543319381 | 0.000198229 | 0.33215501  | 1.575619141 |
| 928.5596231 | 7.866566667 | neg | C47H82NO12P  | PE(DiMe(11,5)/PGE1)                                                                                                            | 1.524933185 | 0.006515024 | 0.296557416 | 3.248489144 |
| 407.280584  | 7.113833333 | neg | C24H40O5     | Ursocholic acid                                                                                                                | 1.51902355  | 0.012736016 | 0.425447154 | 2.538338262 |
| 590.1259756 | 1.042583333 | neg | C27H29O16-   | kaempferol 3-O-beta-D-glucosyl-(1->2)-glucoside                                                                                | 1.506139118 | 5.2285E-06  | 0.213989725 | 1.571514411 |
| 431.2770534 | 7.841416667 | pos | C24H40O5     | 3a,7b,12b-Trihydroxy-5b-cholanoic acid                                                                                         | 1.486833468 | 0.00297024  | 0.181847837 | 6.591262344 |
| 249.1820697 | 13.75586667 | pos | C12H17N5     | N-Cyano-N'-(1,1-dimethylpropyl)-N''-(3-pyridinyl)guanidine                                                                     | 1.473713124 | 0.000707456 | 1.082650965 | 0.88653613  |
| 499.2640293 | 8.734933333 | pos | C28H44O3S    | (6R)-vitamin D2 6,19-sulfur dioxide adduct                                                                                     | 1.461883188 | 0.001245877 | 0.290850607 | 4.658965578 |
| 1109.498821 | 7.848233333 | neg | C50H80O24    | 12-Ketoporrigenin 3-[4'-(2"-glucosyl-3"-xylosyl)-glucosyl]-galactoside]                                                        | 1.454907288 | 0.000315361 | 0.135750355 | 10.5948682  |
| 163.1158283 | 0.665216667 | pos | C8H18OS      | (S1)-Methoxy-3-heptanethiol                                                                                                    | 1.447537942 | 0.020152273 | 1.781726721 | 0.735144    |
| 831.2007612 | 6.996783333 | neg | C37H38O19    | Isoorintin 4'-O-glucoside 2"-O-(E)-ferulate                                                                                    | 1.446845535 | 8.74017E-05 | 0.11331658  | 6.91509619  |
| 193.1587503 | 8.007083333 | pos | C13H20O      | (E)-5,8-Megastigmadien-4-one                                                                                                   | 1.430111065 | 1.58911E-06 | 1.264781237 | 0.67808904  |
| 528.3097809 | 10.75313333 | neg | C27H48NO7P   | LysoPE(22:4(7Z,10Z,13Z,16Z)/0:0)                                                                                               | 1.418176566 | 0.012753014 | 0.584093348 | 2.126418034 |
| 124.051392  | 14.38935    | pos | C5H5N3O      | Pyrazinamide                                                                                                                   | 1.407028631 | 5.73176E-05 | 1.094912955 | 0.856642992 |
| 306.1553507 | 0.7808      | pos | C12H21N5O3   | Histidinyl-Lysine                                                                                                              | 1.356728026 | 0.034405093 | 2.693734274 | 0.653849062 |
| 136.0619968 | 1.111166667 | pos | C5H5N5       | 1H-Pyrazolo[3,4-d]pyrimidin-4-amine                                                                                            | 1.347558849 | 0.028379399 | 1.432794521 | 0.792946992 |
| 747.2181513 | 8.743216667 | neg | C18H18N2O7   | Harmol glucuronide                                                                                                             | 1.332297402 | 0.00105241  | 0.253479508 | 5.661285363 |
| 719.2879001 | 6.284083333 | neg | C19H21FN2O4  | Nadifloxacin                                                                                                                   | 1.291575671 | 0.002116306 | 0.004885268 | 7.906607627 |
| 211.1692916 | 8.0247      | pos | C13H24O3     | 11-Hydroxy-9-tridecenoic acid                                                                                                  | 1.279796576 | 3.14491E-06 | 1.331104455 | 0.683194107 |
| 268.1880893 | 8.007083333 | pos | C15H25NO3    | Metoprolol                                                                                                                     | 1.255003724 | 8.86353E-06 | 1.486426442 | 0.640754463 |
| 937.5277516 | 6.996783333 | neg | C45H81O15P   | PI(20:3(8Z,11Z,14Z)-2OH(5,6)/16:0)                                                                                             | 1.251376505 | 0.00181594  | 0.033071913 | 64.86121275 |
|             |             |     |              | Benzamide,                                                                                                                     |             |             |             |             |
| 1117.548992 | 8.707483333 | neg | C31H37N5O5   | N-[2-[4-(cyclopropylcarbonyl)-3-methyl-1-piperazinyl]-1-[[7-(1,1-dimet<br>hylethyl)-1H-indol-3-yl]methyl]-2-oxoethyl]-4-nitro- | 1.240800633 | 0.003363721 | 1.68622979  | 0.525468413 |

|             |             |     |             |                                                           |             |             |             |             |
|-------------|-------------|-----|-------------|-----------------------------------------------------------|-------------|-------------|-------------|-------------|
| 236.1619925 | 7.088483333 | pos | C12H23NO2   | N-(9-Oxodecyl)acetamide                                   | 1.182644386 | 0.000212536 | 1.409477864 | 0.739531969 |
| 922.5276174 | 7.848233333 | neg | C44H80NO14P | PS(18:0/TXB2)                                             | 1.129564766 | 0.000799651 | 0.066189535 | 17.64649025 |
| 447.2716214 | 6.991983333 | pos | C22H31N5O4  | Melagatran                                                | 1.118092303 | 0.000468984 | 0.128608479 | 5.856580276 |
| 928.565239  | 8.718383333 | pos | C45H84O14P2 | PGP(18:3(9,11,15)-OH(13)/i-21:0)                          | 1.108556196 | 0.00109309  | 0.277291349 | 5.805766627 |
| 483.2962839 | 9.099666667 | neg | C25H42O6    | 3beta-(3-methyl-butanoyloxy)-villanovane-13alpha,17-diol  | 1.106592904 | 0.000429405 | 0.120032802 | 12.77642541 |
| 195.1605142 | 13.47035    | pos | C10H15N3    | Bethanidine                                               | 1.105820183 | 0.001409466 | 1.107611457 | 0.90868718  |
| 570.2565103 | 10.2723     | pos | C27H36O12   | Prupaside                                                 | 1.067156736 | 0.001465246 | 0.569496573 | 1.535973568 |
| 815.2052669 | 8.743216667 | neg | C19H20O10   | Khellol glucoside                                         | 1.057623249 | 0.000232045 | 0.192279012 | 7.416713369 |
| 576.2409991 | 6.996783333 | neg | C26H36F3NO7 | Fluprostenol serinol amide                                | 1.046094961 | 0.000213377 | 0.102580001 | 6.018989931 |
| 905.537942  | 7.605466667 | neg | C52H76O10   | (9Z)-Zeaxanthin dirhamnoside                              | 1.042103184 | 0.007786404 | 0.04170917  | 6.402904743 |
| 263.1614072 | 13.75586667 | pos | C12H15N5O   | [(1R,5R)-5-(6-Aminopurin-9-yl)cyclohex-3-en-1-yl]methanol | 1.029866284 | 0.000111848 | 1.119024884 | 0.89300329  |

FC: fold change; GJLZ: Ganjianglingzhu; GL: low dose of GJLZ; MCD: methionine-choline-deficient; MCS: methionine-choline-sufficient; VIP: variable importance of projection.

**Table S5.** The correlation between biochemical indicators and the metabolites

|                                                                   | TC      | TG      | HDL-C   | ALT     | AST     | FBG     | TBIL   | SOD     | T-AOC   | MDA     |
|-------------------------------------------------------------------|---------|---------|---------|---------|---------|---------|--------|---------|---------|---------|
| alpha-Muricholic acid                                             | -0.164  | .558*   | -0.386  | 0.362   | .600**  | 0.015   | 0.19   | -.625** | -0.34   | .522*   |
| PE(22:4(7Z,10Z,13Z,16Z)/19:0)                                     | 0.489   | -.562*  | .750**  | -.585*  | -.616** | 0.377   | -0.479 | .520*   | .575**  | -.561*  |
| 3alpha-Hydroxy-5beta-chola-7,9(11)-dien-24-oic Acid               | -0.089  | .600*   | -0.421  | 0.476   | .608**  | -0.027  | 0.235  | -.583*  | -0.361  | .581*   |
| 3alpha,6alpha,7beta,12alpha-Tetrahydroxy-5beta-cholan-24-oic Acid | -0.421  | .591*   | -.582*  | 0.403   | .628**  | -0.222  | 0.361  | -.694** | -.493*  | .681**  |
| PS(O-20:0/18:1(9Z))                                               | 0.446   | -0.345  | .718**  | -.738** | -.775** | 0.243   | 0.036  | 0.451   | .747**  | -0.365  |
| LysoPE(0:0/22:6(4Z,7Z,10Z,13Z,16Z,19Z))                           | -0.239  | .543*   | -0.429  | .506*   | .581*   | -0.18   | 0.005  | -.596*  | -.695** | 0.36    |
| 15-keto Latanoprost                                               | -0.175  | .530*   | -0.386  | 0.341   | .593**  | 0.02    | 0.174  | -.615** | -0.325  | .507*   |
| PI(18:0/16:0)                                                     | -0.132  | .580*   | -0.357  | 0.35    | .591**  | 0.02    | 0.18   | -.615** | -0.354  | .510*   |
| 2-Hydroxypyridine                                                 | 0.05    | -.508*  | 0.2     | -0.25   | -0.17   | 0.084   | -0.372 | 0.321   | 0.344   | -0.257  |
| Carcinine                                                         | 0.014   | -.488*  | 0.161   | -0.353  | -0.183  | 0.124   | -0.417 | 0.301   | 0.328   | -0.252  |
| PE(17:0/18:0)                                                     | 0.171   | -.585*  | 0.186   | -0.229  | -0.174  | -0.004  | -0.242 | 0.252   | 0.412   | -0.164  |
| SM(d20:1/22:6(4Z,7Z,11E,13Z,15E,19Z)-2OH(10S,17))                 | -0.161  | .603*   | -0.382  | 0.418   | .633**  | 0.059   | 0.131  | -.627** | -0.404  | 0.478   |
| 4-Amino-5-hydroxymethyl-2-methylpyrimidine                        | -0.082  | -.602*  | 0.2     | -0.235  | -0.234  | 0.128   | -0.445 | 0.333   | 0.335   | -0.257  |
| LysoPE(0:0/22:5(7Z,10Z,13Z,16Z,19Z))                              | -0.157  | .645**  | -0.321  | .553*   | 0.451   | 0.011   | 0.321  | -0.355  | -.475*  | 0.279   |
| N-Acetylhistamine                                                 | 0.025   | -.494*  | 0.189   | -0.359  | -0.203  | 0.136   | -0.379 | 0.282   | 0.384   | -0.216  |
| Tetraethylene glycol monododecyl ether                            | -0.043  | -.697** | 0.171   | -0.176  | -0.189  | 0.206   | -0.242 | 0.346   | .533*   | -0.221  |
| N4-Cyclopropylpyridine-3,4-diamine                                | 0.146   | -.489*  | 0.311   | -0.315  | -0.247  | 0.323   | -0.418 | 0.38    | .484*   | -0.377  |
| Cholic acid                                                       | -0.161  | .551*   | -0.489  | 0.429   | .589*   | -0.124  | 0.332  | -.630** | -0.382  | .632**  |
| 2-Ethyl-3-methylpyrazine, 9CI                                     | 0.104   | -0.47   | 0.311   | -0.326  | -0.238  | 0.234   | -0.384 | 0.353   | .470*   | -0.304  |
| Cholic acid glucuronide                                           | -.660** | .503*   | -.839** | .726**  | .768**  | -0.375  | 0.463  | -.769** | -.575*  | .762**  |
| N6-Succinyl Adenosine                                             | -0.432  | 0.303   | -.679** | 0.265   | 0.41    | -.609** | 0.485  | -.713** | -0.398  | .716**  |
| Glycine, L-g-glutamyl-L-cysteinyl-, 3-methyl ester                | .782**  | -0.408  | .875**  | -.559*  | -.752** | 0.408   | -0.226 | .672**  | .595**  | -.669** |
| LysoPA(22:4(7Z,10Z,13Z,16Z)/0:0)                                  | -.550*  | 0.433   | -.782** | .624**  | .688**  | -.711** | 0.264  | -.792** | -.758** | .841**  |

|                                                                                     |         |         |         |        |        |         |        |         |         |         |
|-------------------------------------------------------------------------------------|---------|---------|---------|--------|--------|---------|--------|---------|---------|---------|
| trapidil                                                                            | 0.321   | -0.374  | 0.432   | -0.365 | -0.296 | .522*   | -.598* | .527*   | .482*   | -.556*  |
| 5-Dodecen-11-olide                                                                  | 0.021   | -.516*  | 0.207   | -0.312 | -0.199 | 0.111   | -0.479 | 0.341   | 0.349   | -0.265  |
| Kuwanon V                                                                           | -0.482  | .565*   | -.611*  | 0.468  | .639** | -0.253  | 0.361  | -.711** | -.525*  | .718**  |
| 3'-Azido-3'-deoxythymidine, 98%                                                     | 0.3     | -.690** | 0.5     | -.512* | -0.465 | 0.306   | -.528* | 0.343   | .526*   | -0.402  |
| Cerotic acid(d3)                                                                    | 0.432   | -0.465  | .546*   | -0.385 | -0.35  | .504*   | -0.422 | 0.343   | .509*   | -.566*  |
| (22E)-3beta-Hydroxy-5alpha-chola-7,22-dien-24-oic Acid                              | -0.129  | .660**  | -0.311  | .538*  | .484*  | 0.105   | 0.352  | -0.426  | -0.295  | 0.441   |
| 4-[(2R)-2-Aminopropyl]imidazole-1-carboxylic acid                                   | 0.061   | -.484*  | 0.182   | -0.3   | -0.166 | 0.098   | -0.427 | 0.326   | 0.351   | -0.248  |
| bhas#32                                                                             | 0.282   | -0.389  | 0.382   | -0.25  | -0.269 | 0.391   | -0.332 | .534*   | .565*   | -0.463  |
| 6"-O-alpha-D-Galactopyranosylciceritol                                              | -0.139  | .503*   | -0.386  | 0.274  | .556*  | 0.053   | 0.131  | -.569*  | -0.291  | 0.453   |
| Glycochenodeoxycholate-3-sulfate                                                    | 0.279   | -0.372  | 0.325   | -0.253 | -0.236 | 0.163   | -0.33  | 0.463   | .458*   | -0.289  |
| Lipoxin C4                                                                          | -0.371  | 0.319   | -.689** | 0.447  | .670** | -0.394  | 0.018  | -.559*  | -.684** | 0.395   |
| PIP(22:3(10Z,13Z,16Z)/PGJ2)                                                         | -0.115  | .568*   | -0.326  | 0.304  | .544*  | 0.056   | 0.188  | -.582*  | -0.338  | 0.455   |
| 8,13-Abietadien-18-oic acid                                                         | -.543*  | .521*   | -.768** | .674** | .690** | -.567** | 0.422  | -.608** | -.761** | .762**  |
| 4-[[2-Methyl-2-[4-[5-(trifluoromethyl)pyridin-2-yl]piperazin-1-yl]propanoyl]amino]a |         |         |         |        |        |         |        |         |         |         |
| damantane-1-carboxamide                                                             | -0.243  | .560*   | -0.432  | 0.374  | .624** | 0.014   | 0.189  | -.618** | -0.361  | .525*   |
| 1,3,7,12-Tetrahydroxycholan-24-oic acid                                             | -0.332  | 0.46    | -.518*  | 0.365  | .552*  | -0.167  | 0.309  | -.551*  | -0.398  | .667**  |
| PC(DiMe(9,3)/MonoMe(9,5))                                                           | -0.483  | .548*   | -.568*  | 0.446  | .654** | -0.159  | 0.271  | -.703** | -.487*  | .663**  |
| Triethylenemelamine                                                                 | 0.061   | -.494*  | 0.211   | -0.371 | -0.236 | 0.063   | -0.413 | 0.324   | 0.372   | -0.277  |
| sn-3-O-(geranylgeranyl)glycerol 1-phosphate                                         | -0.189  | .560*   | -0.443  | 0.475  | .569*  | -0.053  | 0.29   | -.624** | -0.354  | .649**  |
| Ilaprazole sulfone                                                                  | -0.47   | .574*   | -.616*  | 0.472  | .650** | -0.248  | 0.386  | -.715** | -.520*  | .710**  |
| Deoxynojirimycin Tetrabenzyl Ether                                                  | -0.041  | .576*   | -0.288  | 0.427  | .491*  | 0.067   | 0.274  | -.584*  | -0.255  | .520*   |
| 4-Phenylbutyl glucosinolate                                                         | -0.339  | 0.327   | -.579*  | 0.209  | 0.375  | -.562** | .580*  | -.696** | -0.384  | .706**  |
| FAPy-adenine                                                                        | 0.371   | -.571*  | .582*   | -.506* | -.476* | .562**  | -0.488 | 0.475   | .616**  | -.627** |
| PC(MonoMe(9,5)/MonoMe(9,5))                                                         | -0.204  | 0.398   | -.516*  | .564*  | .706** | 0.062   | 0.181  | -.622** | -0.301  | .504*   |
| LysoPC(P-18:0/0:0)                                                                  | -.668** | 0.362   | -.896** | .741** | .800** | -.609** | 0.293  | -.706** | -.737** | .738**  |
| PE(DiMe(11,5)/PGE1)                                                                 | -0.186  | .645**  | -0.332  | 0.465  | .637** | 0.06    | -0.065 | -.608** | -0.426  | 0.424   |

|                                                                                                                            |         |         |         |         |         |         |        |         |         |        |
|----------------------------------------------------------------------------------------------------------------------------|---------|---------|---------|---------|---------|---------|--------|---------|---------|--------|
| Ursocholic acid                                                                                                            | -0.182  | .575*   | -0.421  | .506*   | .620**  | 0.167   | 0.095  | -0.373  | -0.295  | 0.453  |
| kaempferol 3-O-beta-D-glucosyl-(1-&gt;2)-glucoside                                                                         | -.611*  | 0.44    | -.843** | .768**  | .750**  | -.618** | .517*  | -.610** | -.704** | .755** |
| 3a,7b,12b-Trihydroxy-5b-cholanoic acid                                                                                     | -0.1    | .549*   | -0.311  | 0.326   | .581*   | 0.072   | 0.07   | -.647** | -0.332  | .498*  |
| N-Cyano-N'-(1,1-dimethylpropyl)-N''-(3-pyridinyl)guanidine                                                                 | 0.064   | -0.456  | 0.25    | -0.285  | -0.179  | 0.246   | -0.433 | 0.387   | 0.416   | -0.368 |
| (6R)-vitamin D2 6,19-sulfur dioxide adduct                                                                                 | -0.071  | .625**  | -0.411  | 0.479   | .577*   | -0.043  | 0.352  | -.583*  | -0.354  | .574*  |
| 12-Ketoporrigenin 3-[4'-(2"-glucosyl-3"-xylosyl)-glucosyl]-galactoside]                                                    | -0.172  | .539*   | -0.369  | 0.298   | .560*   | 0.016   | 0.203  | -.617** | -0.367  | .526*  |
| (S1)-Methoxy-3-heptanethiol                                                                                                | .557*   | -0.161  | .629*   | -0.474  | -.600** | 0.251   | 0.147  | .642**  | .630**  | -.488* |
| Isoorientin 4'-O-glucoside 2"-O-(E)-ferulate                                                                               | -0.455  | .565*   | -.595*  | 0.416   | .628**  | -0.226  | 0.359  | -.698** | -.501*  | .695** |
| (E)-5,8-Megastigmadien-4-one                                                                                               | 0.218   | -.660** | 0.411   | -.529*  | -.494*  | 0.056   | -0.232 | 0.336   | .458*   | -0.252 |
| LysoPE(22:4(7Z,10Z,13Z,16Z)/0:0)                                                                                           | -0.121  | .495*   | -0.343  | .576*   | 0.414   | -0.183  | 0.206  | -0.137  | -.554*  | 0.093  |
| Pyrazinamide                                                                                                               | 0.068   | -.558*  | 0.221   | -0.362  | -0.226  | 0.243   | -0.408 | 0.387   | .456*   | -0.287 |
| HistidinyL-Lysine                                                                                                          | .525*   | 0.011   | .579*   | -0.321  | -0.276  | 0.358   | -0.174 | 0.471   | 0.426   | -0.277 |
| 1H-Pyrazolo[3,4-d]pyrimidin-4-amine                                                                                        | 0.311   | -.488*  | 0.454   | -.535*  | -0.424  | .477*   | -0.474 | 0.338   | .458*   | -.532* |
| Harmol glucuronide                                                                                                         | -0.09   | .627**  | -0.401  | .513*   | .562*   | -0.001  | 0.374  | -.560*  | -0.315  | .510*  |
| Nadifloxacin                                                                                                               | -.693** | 0.363   | -.835** | .678**  | .758**  | -0.398  | 0.373  | -.815** | -.548*  | .760** |
| 11-Hydroxy-9-tridecenoic acid                                                                                              | 0.289   | -.704** | .536*   | -.659** | -.589*  | 0.167   | -0.269 | 0.365   | .525*   | -0.365 |
| Metoprolol                                                                                                                 | 0.364   | -.625** | .629*   | -.724** | -.645** | 0.21    | -0.303 | 0.419   | .532*   | -0.417 |
| PI(20:3(8Z,11Z,14Z)-2OH(5,6)/16:0)                                                                                         | -0.483  | .548*   | -.568*  | 0.446   | .654**  | -0.161  | 0.271  | -.703** | -.488*  | .663** |
| Benzamide,                                                                                                                 |         |         |         |         |         |         |        |         |         |        |
| N-[2-[4-(cyclopropylcarbonyl)-3-methyl-1-piperazinyl]-1-[[7-(1,1-dimethylethyl)-1H-indol-3-yl]methyl]-2-oxoethyl]-4-nitro- | -0.104  | -.652** | 0.239   | -0.265  | -0.414  | 0.014   | -0.338 | 0.439   | 0.251   | -0.458 |
| N-(9-Oxodecyl)acetamide                                                                                                    | 0.343   | -.537*  | .643**  | -.718** | -.602** | 0.253   | -0.427 | .498*   | 0.446   | -.517* |
| PS(18:0/TXB2)                                                                                                              | -0.168  | .508*   | -0.385  | 0.307   | .550*   | -0.1    | 0.246  | -.733** | -0.425  | .581*  |
| Melagatran                                                                                                                 | -0.419  | .570*   | -.566*  | 0.428   | .607**  | -0.187  | 0.405  | -.676** | -.467*  | .666** |
| PGP(18:3(9,11,15)-OH(13)/i-21:0)                                                                                           | -0.139  | .579*   | -0.421  | .530*   | .597**  | -0.009  | 0.379  | -.611** | -0.351  | .560*  |
| 3beta-(3-methyl-butanoyloxy)-villanovane-13alpha,17-diol                                                                   | -0.389  | .628**  | -.573*  | .513*   | .677**  | -0.102  | 0.269  | -.655** | -.506*  | .670** |

|                                                           |        |        |         |        |        |        |        |         |         |        |
|-----------------------------------------------------------|--------|--------|---------|--------|--------|--------|--------|---------|---------|--------|
| Bethanidine                                               | 0.375  | -0.408 | 0.496   | -0.403 | -0.366 | 0.441  | -0.397 | 0.453   | .553*   | -.537* |
| Prupaside                                                 | -0.468 | 0.456  | -.689** | .653** | .783** | -0.355 | -0.002 | -.738** | -.739** | .574*  |
| Khellol glucoside                                         | -0.12  | .541*  | -0.393  | 0.474  | .558*  | -0.046 | 0.318  | -.618** | -0.352  | .548*  |
| Fluprostenol serinol amide                                | -0.436 | .584*  | -.579*  | 0.4    | .618** | -0.228 | 0.338  | -.691** | -.498*  | .691** |
| (9Z)-Zeaxanthin dirhamnoside                              | -0.189 | 0.363  | -.530*  | .573*  | .704** | 0.038  | 0.179  | -.608** | -0.276  | .512*  |
| [(1R,5R)-5-(6-Aminopurin-9-yl)cyclohex-3-en-1-yl]methanol | 0.321  | -0.276 | .525*   | -0.332 | -0.337 | .519*  | -0.424 | .630**  | .554*   | -.547* |

ALT: alanine transaminase; AST: aspartate transaminase; FBG: fasting blood glucose; HDL-C: high-density lipoprotein cholesterol; MDA: malondialdehyde; SOD: superoxide dismutase; TBIL: total bilirubin; TC: total cholesterol; TG: triglyceride; T-AOC: total antioxidant capacity. \* Correlation is significant at the 0.05 level (2-tailed); \*\* correlation is significant at the 0.01 level (2-tailed).

## References

- 1 Li, G., Nikolic, D. & van Breemen, R. B. Identification and Chemical Standardization of Licorice Raw Materials and Dietary Supplements Using UHPLC-MS/MS. *J Agric Food Chem* **64**, 8062-8070, doi:10.1021/acs.jafc.6b02954 (2016).
- 2 Xue, G. *et al.* Integrative analyses of widely targeted metabolomic profiling and derivatization-based LC-MS/MS reveals metabolic changes of Zingiberis Rhizoma and its processed products. *Food Chem* **389**, 133068, doi:10.1016/j.foodchem.2022.133068 (2022).
- 3 Song, L. *et al.* Structural identification and comprehensive comparison of saponin-related impurities present in the three different compound glycyrrhizin tablets. *J Pharm Biomed Anal* **229**, 115287, doi:10.1016/j.jpba.2023.115287 (2023).
- 4 Sun, L. *et al.* Rapid characterization of chemical constituents of Shaoyao Gancan decoction using UHPLC coupled with Fourier transform ion cyclotron resonance mass spectrometry. *RSC Adv* **10**, 29528-29535, doi:10.1039/d0ra04701e (2020).
- 5 Wong, Y. F. *et al.* Untargeted profiling of Glycyrrhiza glabra extract with comprehensive two-dimensional liquid chromatography-mass spectrometry using multi-segmented shift gradients in the second dimension: Expanding the metabolic coverage. *Electrophoresis*, doi:10.1002/elps.201700469 (2018).
